# Supplementary material
Source: PubMed Central journal article supplement (PMC9639752)

## Supplementary Table 1. IPA analysis of enriched gene network

| © 2000-2020 QIAGEN. All rights reserved. |                                                                                                                                                                                                                                              |       |                 |                                                                                                           |
|------------------------------------------|----------------------------------------------------------------------------------------------------------------------------------------------------------------------------------------------------------------------------------------------|-------|-----------------|-----------------------------------------------------------------------------------------------------------|
| ID                                       | Molecules in Network                                                                                                                                                                                                                         | Score | Focus Molecules | Top Diseases and Functions                                                                                |
| 1                                        | ADRB,AKR1B10,Akt,ATF2,CD3G,Creb,CyclinA,E2f,E2F4,E2F7,E2F8,ERK,ERK1/2,FABP5,FOXA3,GABBR1,GLUL,H2AC6,H3C2,Histoneh3,Igm,IL18R1,KRAS,KRT16,KRT6B,LGR4,MAFB,MCM2,NFATC1,RBL2,RRM2,SFN,Stfa3,TCR,UHRF1                                           | 44    | 25              | [Cellular Development, Cellular Growth and Proliferation, Tissue Development]                             |
| 2                                        | C15orf48,CAP1,CENPS/CENPS-ORT, CHAF1A, CHAF1B, CREBBP,CRISPLD2,CSF2,DIO2,E2F7,ERK,FABP4,FNBP1,H2AC4,H2AC7,IL10RA,IL17A,LEP,LSG1,MCM6,NME1,PAX6,PBK,PPARG,PTGER2,RB1,RRM2,SPARC,Sprr1b,STING1,TICRR,TOMM6,VDR,VEGFA,ZCCHC8                    | 24    | 16              | [Cellular Development, Cellular Growth and Proliferation, Hematological System Development and Function]  |
| 3                                        | AR,CD96,CDS2,Cox5b,Csta3,CX3CL1,CYP26B1,DECR1,ERK,FABP4,FBL,FOXA2,FOXO1,FOXO3,GATA2,Gcg,H1-3,HDAC1,IGF1,IL4,LCK,LEP,MTOR, MYC, POLD2, PPARA,PPARG,PPP4R2,PTPRS,RORA,RPL3L,SLC7A5,SMC3,STAT5B,YY1                                             | 20    | 14              | [Cellular Development, Connective Tissue Development and Function, Tissue Development]                    |
| 4                                        | Akt,AKT1,AR,ASF1A,ASF1B,ATP6V0C,CDKN1B,ERK,FABP5,FOXO1,FOXO3,FOXO4,FOXP3, H3C11, HUWE1,IL17A,JAK3,LEP,MTOR,Ncoa6,NR1H4,ORMDL2,POU5F1,PPARG,RICTOR,RORC,RPN2,SLC66A3, SNX6, TGFA,TLR9, TOP1,TP53, Urah, URB2                                  | 18    | 13              | [Cancer, Organismal Injury and Abnormalities, Tumor Morphology]                                           |
| 5                                        | ADNP,AGRN,AQP3,AR,BTC,CBFA2T3,CDH13,ERK,ESR2,FABP4,FOS,FOXO3,FOXP3,H1f1,HMGB2,IL17A,IL6,INSIG1,IFN $\alpha$ ,KAT8,KIF21B,LEP,MAPK1,MKNK1,Ncoa6,PLA2G4F,PLA2G5,PPARA,RGS2,RORC,TAOK1,TRPM4,VEGFA,WDR61,Wfdc3                                  | 16    | 12              | [Lipid Metabolism, Molecular Transport, Small Molecule Biochemistry]                                      |
| 6                                        | ABCA3,ABHD12B,ARPC4,ATP12A,CEBPA,CREB3L4,CREM,CTNNA1,DLG4,FABP4,FMR1,FOXA2,FOXO1,FOXO3,FOXOP3,FRMD6,FSCN1,FSHB,FXR2,Gcg,IL21,ITIH5,KCNE3,LDLR,LEP,miR-9-5p, MTOR, NR4A1, NR4A2, PLCH2,PRKAA2, RDH11, SCAP, TUBB2B, VEGFA                     | 16    | 12              | [Carbohydrate Metabolism, Lipid Metabolism, Molecular Transport]                                          |
| 7                                        | ANG,Defb3,DUSP16,EGLN,EIF2S1,ERK,FABP4,FLRT3,FOXO3,FOXP3,GATA3,GCLC,GCLM,GNA12,GSTA3,H2AC8,IL17A, IL1R2,Lce3a (includes others), LEP, MTOR,NARS1, NBR1, NCK1, NFE2L2, NR1H4, PPARA, PPARG,RXRA,SENP6, SERPINA9, SLC30A4, SLC7A11, TNF, VEGFA | 14    | 11              | [Cardiovascular Disease, Connective Tissue Development and Function, Organismal Injury and Abnormalities] |
| 8                                        | Akt,BAX,BCL6,CCND2,COP1,CYBB,EGFR,ERK,ETV4,FCGR2A,FCRL1,FGF21,GADD45G,GATA3,IL17A,LCP2,Ly6a (includes others),LYAR,MAP2K4,MYB,NAA10,P38 MAPK,PLCG2,PTPN1,PTPN6,SERPINE1,SMARCA5,SOCS1,STAT6, Tgf beta,TIMM9,TMEM176B,TNFSF11,TP53,ZNF442     | 8     | 7               | [Cellular Development, Cellular Growth and Proliferation, Hematological System Development and Function]  |

**Supplementary Table 2. Real time PCR primers used in paper**

|                |                                                                                         |
|----------------|-----------------------------------------------------------------------------------------|
| HPRT           | forward: 5'-AGCCTAAGATGAGCGCAAGT -3'<br>reverse: 5'-TACTAGGCAGATGGCCACA-3               |
| Alox5          | forward: 5' -CTGCTGGACAAGGCATTCTA-3'<br>reverse : 5' -TCCATCCCTCAGGACAATCT-3'           |
| Alox12         | forward: 5'-GGCTATCCAGATTCAGCCCC-3'<br>reverse: 5'-CCGGCTTCGCGGTTAATTT-3'               |
| CCL2           | forward: 5'-GGATTCACAGAGAGGGAAAAATGG-3'<br>reverse: 5'-CACTCACCTGCTGCTACTCATTAC-3'      |
| CCL17          | forward: 5'-CCCATGAAGACCTTCACCTC-3'<br>reverse: 5'-CATCCCTGGAACACTCCACT-3'              |
| CCL22          | forward: 5'-TGACTTGGGTCTTGTCTCTC-3'<br>reverse: 5'-AAGGAAGCCACCAATGACAC-3'              |
| CCR2           | forward: 5'-TACGATGATGGTGAGCCTTG-3'<br>reverse: 5'-GTGAGCAGGAAGAGCAGGTC-3'              |
| COX2           | forward: 5'- ACACACTCTATCACTGGCACC-3'<br>reverse: 5' -TTCAGGGCGAAGCGTTTGC-3'            |
| CXCL1          | forward: 5'- CCGAAGTCATAGCCACACTCAA-3'<br>reverse: 5'-GCAGTCTGTCTTCTTTCTCCGTTA -3'      |
| CXCL2          | forward: 5'-GAAGTCATAGCCACTCTCAAGG -3'<br>reverse: 5'- CCTCCTTTCAGGTCAGTTAGC-3          |
| CXCR2          | forward: 5'- TTCTGACCCGCCCTTACTCTGT -3'<br>reverse: 5'- CGCAGTGTGAACCCATAGCAG -3'       |
| cPLA2G4E       | forward: 5'-AGAAGCGGAAGATGGTGGTG-3'<br>reverse : 5' -TGGCTATTATCGGTACCTCATCC-3'         |
| cPLA2G4F       | forward: 5'-ATAGCCAGAGAAAGGGTGGC-3'<br>reverse: 5' -CAGTCGGCTTTGGACAACCTTAT-3'          |
| FABP4          | forward: 5'- TTTCTTCAAACCTGGGCGTG-3'<br>reverse: 5'- CATTCCACCACCAGCTTGTC-3'            |
| EFABP          | forward: 5'-AACCGAGAGCACAGTGAAG-3',<br>reverse: 5'-ACACTCCACGATCATCTTCC-3'              |
| IL-1 $\beta$   | forward: 5'-GAAATGCCACCTTTTGACAGTG -3 '<br>reverse: 5'- TGGATGCTCTCATCAGGACAG- 3'       |
| IL-6           | forward: 5'- CCAGCTATGAACTCCTTCTC -3 '<br>reverse: 5'- GCTTGTTCTCACATCTCTC- 3'          |
| IL-8           | forward: 5'-CAA ACC TTT CCA CCC CAA AT-3 '<br>reverse: 5-ATT GCA TCT GGC AAC CCT AC-3 ' |
| IL-36 $\gamma$ | forward: 5'- TCACGCTGACTGGGGTACT -3 '<br>reverse: 5'- TCCTGACTTTGGGGAGGTTTT- 3'         |
| LTA4H          | forward: 5'- GAGGTCGCGGATACTTGCTC-3'<br>reverse: 5'- CTCCTGTGACTGGACCGTG-3'             |
| PGE2           | forward: 5'- CATCAAGATGTACGCGGTGG-3 '<br>reverse: 5'- CTCCACATCTGGGTCACTCC- 3'          |
| PGI2           | forward: 5'- GGTGGCGGTGACTTGTTGC-3'<br>reverse: 5'- TCCAACGGAGGCTCACCAG-3'              |
| PPAR $\alpha$  | forward: 5'- TGGTGTTTCGAGCTGTTTTG-3'<br>reverse: 5'- CACAGAGCGCTAAGCTGTGA-3'            |
| PPAR $\beta$   | forward: 5'- CGGACCTGGGGATTAATGGG -3'<br>reverse: 5'- GCGCAGATGGACTGCCTTTA -3'          |
| PPAR $\gamma$  | forward: 5'- GCCTATGAGCACTTCACAAGAAAT -3'<br>reverse: 5'- GGAATGCGAGTGGTCTTCCA 3'       |
| TNF $\alpha$   | forward: 5'- GAACTGGCAGAAGAGGCACT-3'<br>reverse: 5'- AGGGTCTGGGCCATAGAACT- 3'           |
| TXA2           | forward: 5'- ACCTACTTCTTTCTCCACCACCT-3'<br>reverse: 5'- TGATGCCCAACTTCTCCAGTC-3'        |

# Supplementary Figure 1

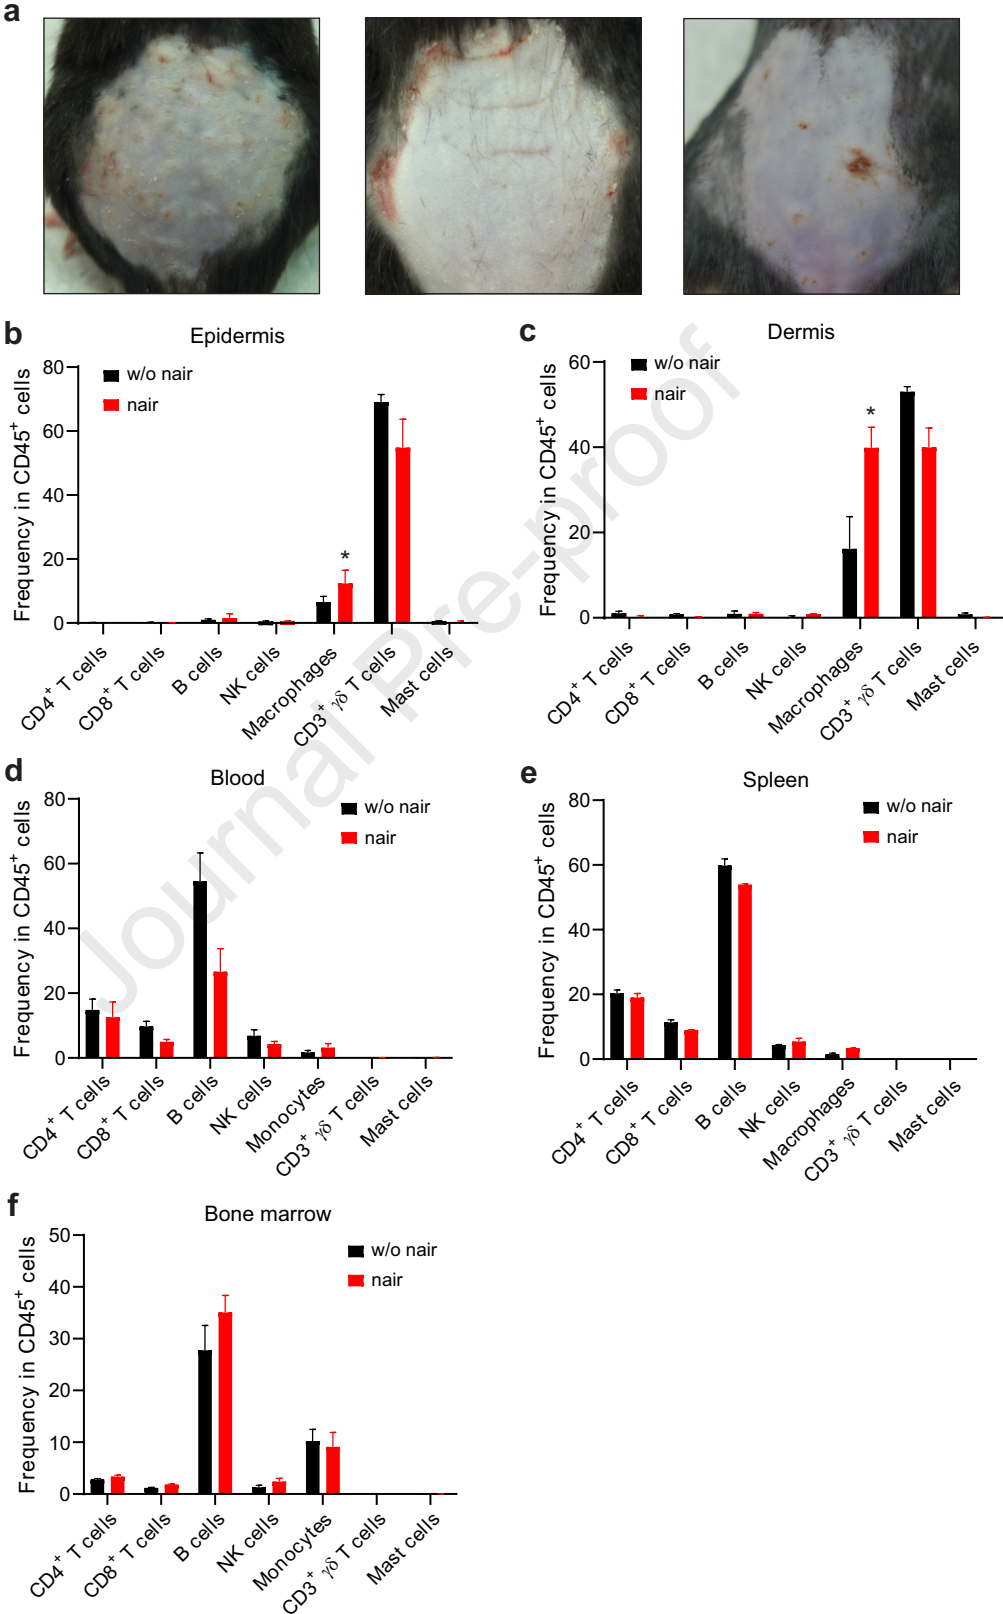

# Supplementary Figure 2

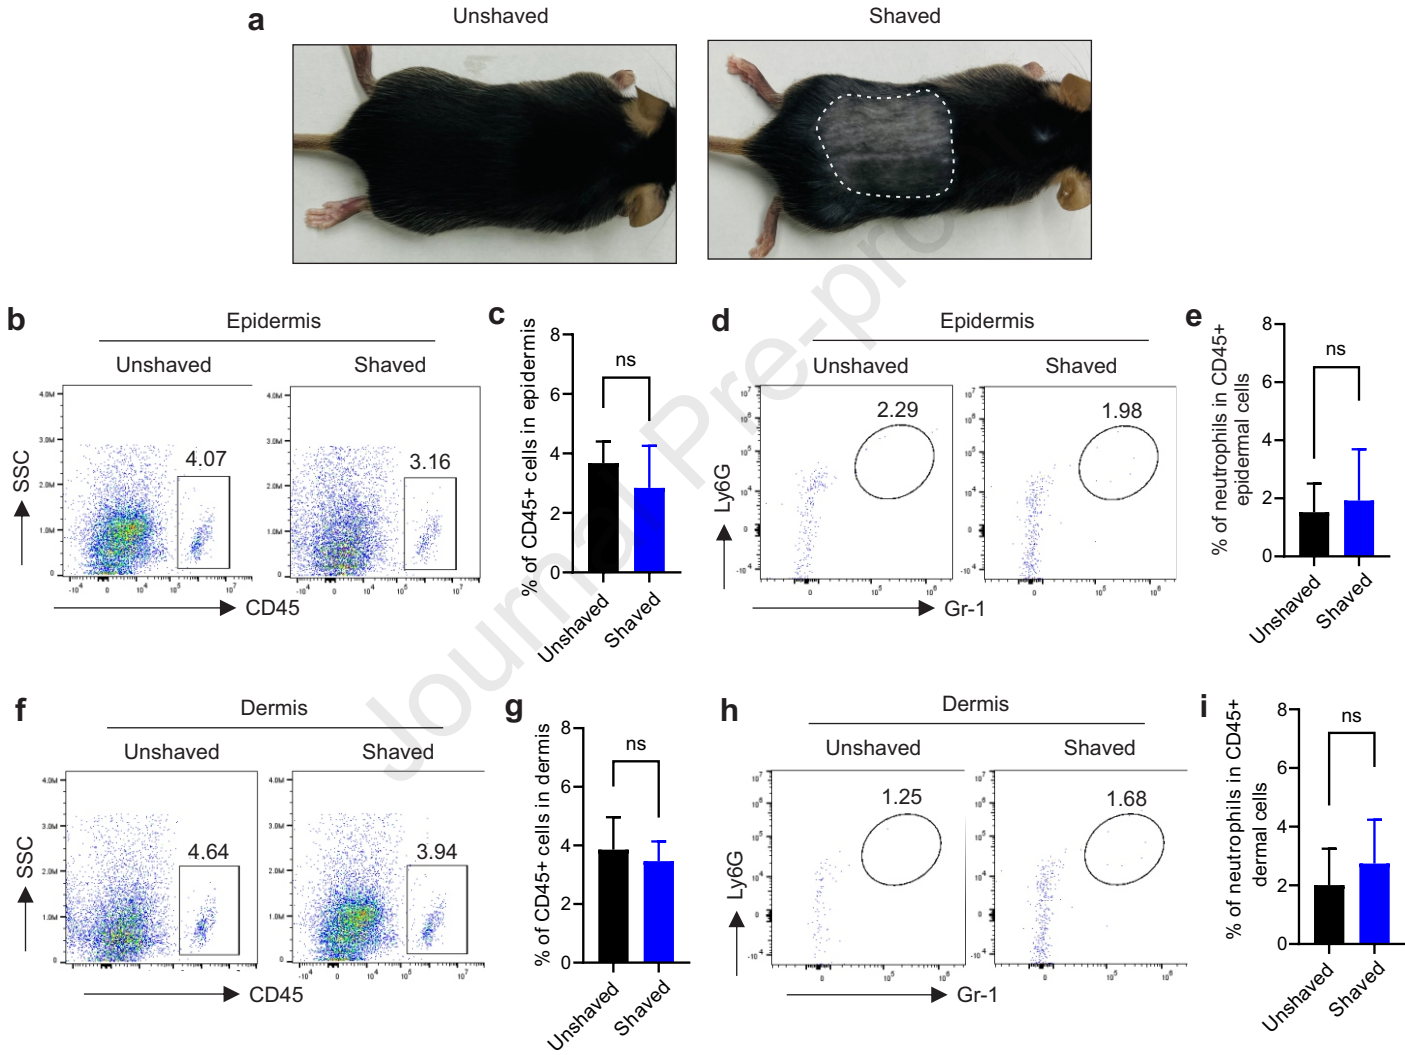

Supplementary Figure 3

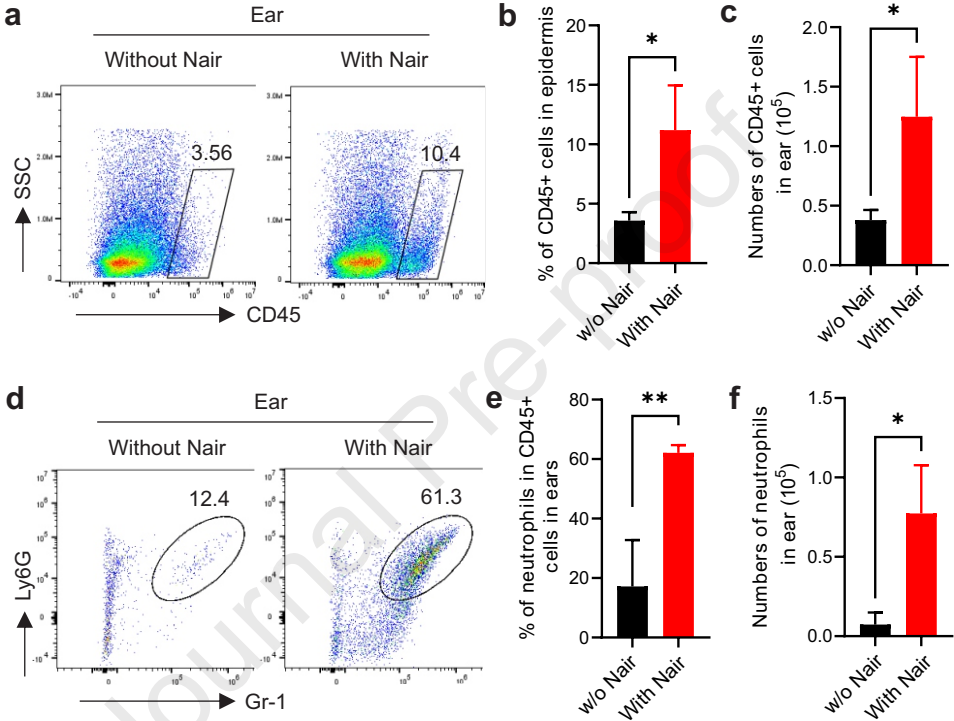

# Supplementary Figure 4

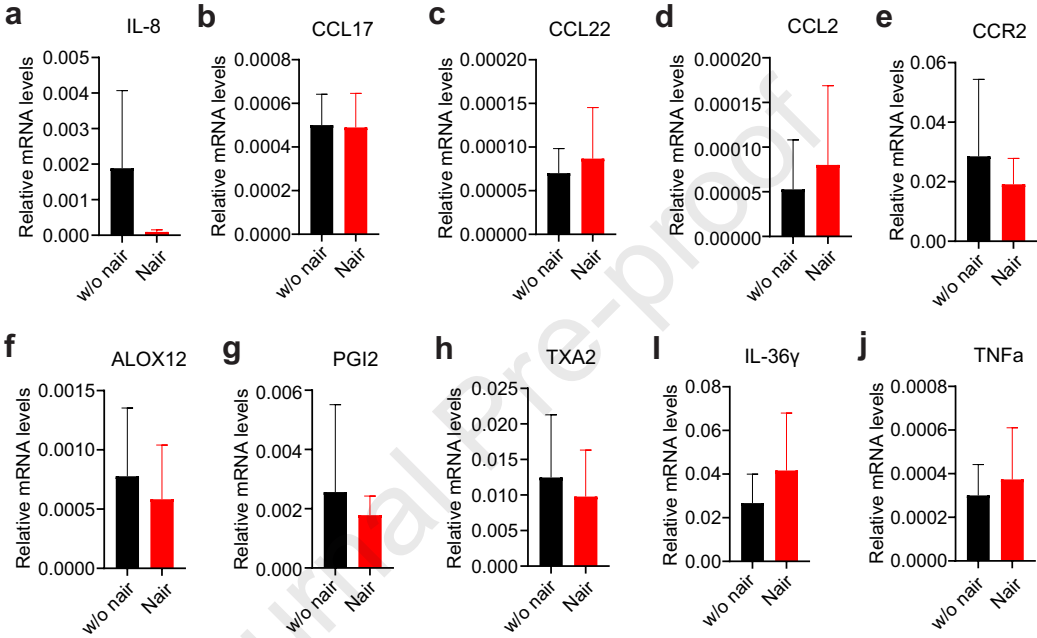

Supplementary Figure 5

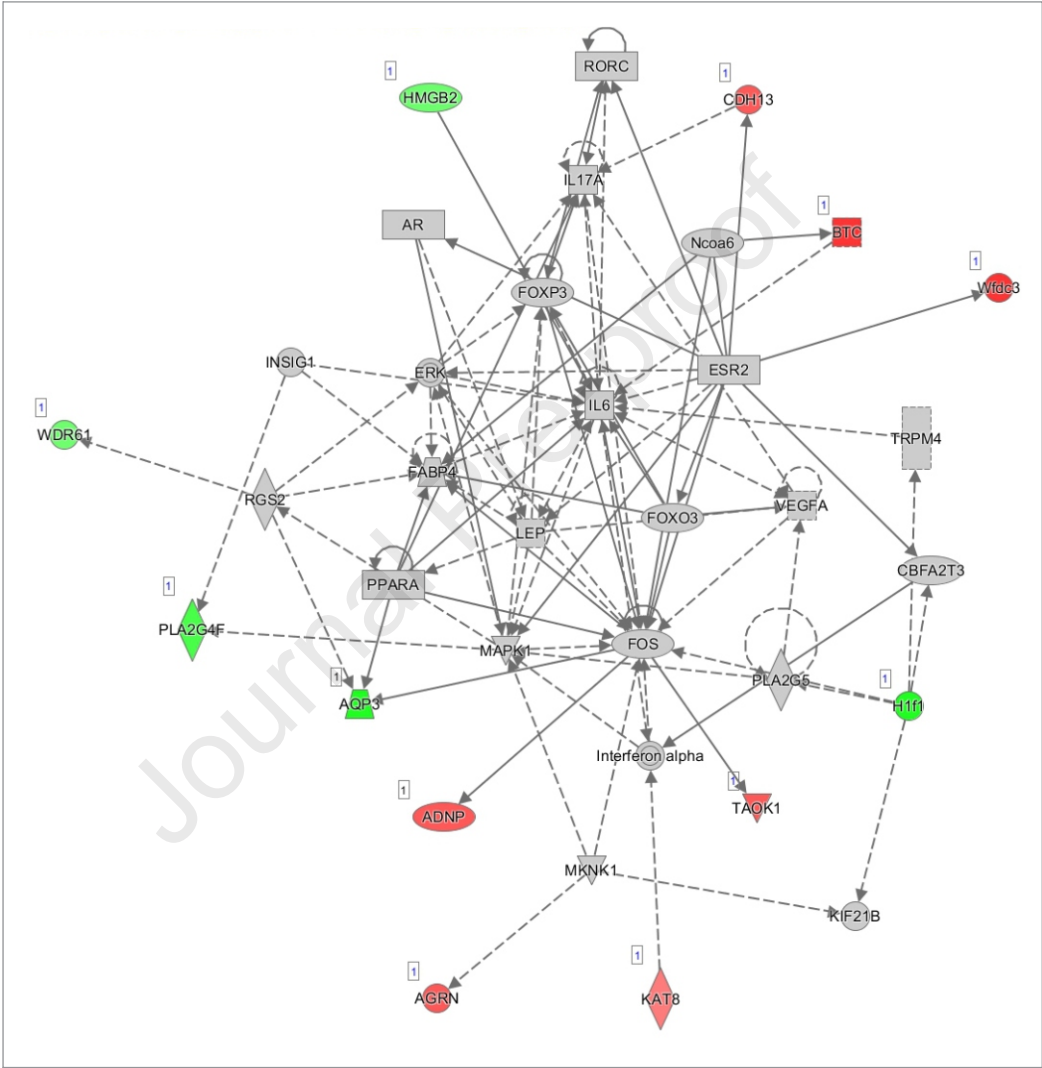

# Supplementary Figure 6

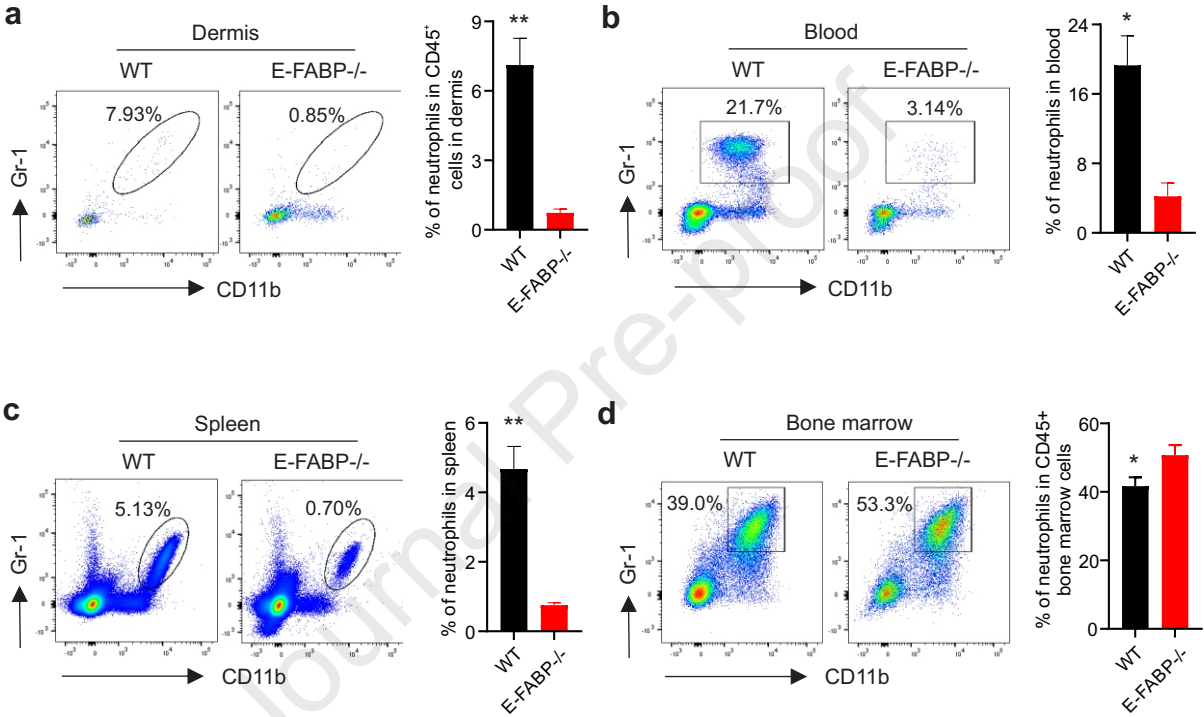

Supplement: NIHMS1766196-supplement-1.pdf [file NIHMS1766196-supplement-1.pdf]
